25 **Abstract**

26 **A protein binder with a desired epitope and binding affinity is critical to the development**  
27 **of therapeutic agents. Here we present computationally-guided design and affinity**  
28 **improvement of a protein binder recognizing a specific site on domain IV of human**  
29 **epidermal growth factor receptor 2 (HER2). As a model, a protein scaffold composed of**  
30 **Leucine-rich repeat (LRR) modules was used. We designed protein binders which appear**  
31 **to bind a target site on domain IV using a computational method. Top 10 designs were**  
32 **expressed and tested with binding assays, and a lead with a low micro-molar binding**  
33 **affinity was selected. Binding affinity of the selected lead was further increased by two-**  
34 **orders of magnitude through mutual feedback between computational and experimental**  
35 **methods. The utility and potential of our approach was demonstrated by determining the**  
36 **binding interface of the developed protein binder through its crystal structure in complex**  
37 **with the HER2 domain IV.**

38

39

40

41

42

43

44

45

46

47

48

49

## 50 **Introduction**

51 A protein binder with a desirable epitope and a binding affinity is crucial to its development as  
52 a therapeutic agent since its efficacy is largely affected by a region where it binds on a target  
53 and its binding affinity (Ledford 2008; Chames et al. 2009). Experimental approaches  
54 comprising repeated rounds of a library construction and screening have been most widely used,  
55 but they are labor-intensive and time-consuming, and almost impossible to specify the binding  
56 region (Lerner 2006; Dunn 2010). The difficulty dramatically emerges if a target is a multi-  
57 domain protein with a large size. Especially, in the case of a library-based approach, selection  
58 of an initial binder usually determines the fate of a whole process including the *in vitro* and *in*  
59 *vivo* experiments.

60 Computational methods have recently attracted a considerable attention as a promising  
61 paradigm to design a protein binder with desired activity. Advances in computing power and  
62 algorithms have enabled the prediction of precise energy landscapes, leading to notable  
63 successes in computational protein designs (Silva et al. 2019; Chevalier et al. 2017; Ramisch  
64 et al. 2014; Tinberg et al. 2013; Fleishman, Whitehead, et al. 2011; Cannon et al. 2019). Despite  
65 many advances, however, purely computational design of a protein binder with a desired  
66 epitope and binding affinity remains a challenge. It has been known that current scoring  
67 functions may not be precise enough mainly due to limitations to accurately define the binding  
68 free energy landscapes (Houk and Liu 2017). Furthermore, if a target protein is composed of  
69 multi-domains and structurally flexible loops, it is extremely difficult to computationally  
70 design a protein binder with a desired epitope and a high affinity. Overall, design of such  
71 protein binder by computational method has been limited so far to target proteins with certain

72 “ideal” features such as high secondary-structure content (Whitehead, Baker, and Fleishman  
73 2013).

74 Human epidermal growth factor receptor 2 (HER2) is a well-known drug target for  
75 various cancers, representing a typical multi-domain membrane protein mainly composed of a  
76 number of flexible loops (Menard et al. 2003; Tebbutt, Pedersen, and Johns 2013; Cho et al.  
77 2003; Banappagari, Ronald, and Satyanarayanajois 2010; Kastner et al. 2009). Monoclonal  
78 antibody trastuzumab is known to bind to the HER2 extracellular domain IV (HER2 domain  
79 IV), effectively inhibiting a HER2-mediated cell signaling process (Tebbutt, Pedersen, and  
80 Johns 2013; Arkhipov et al. 2013). Here we present computationally-guided design and affinity  
81 improvement of a protein binder targeting the trastuzumab epitope on domain IV of HER2  
82 which mainly consists of flexible loops. As a model, a protein scaffold composed of LRR  
83 (Leucine-rich repeat) modules was employed. We firstly designed protein binders which  
84 appear to recognize the target site on domain IV through computational method based on the  
85 predicted complex model structures for HER2 domain IV and a protein scaffold (**Figure. 1**).  
86 Top 10 designs were expressed, and a lead with a low micromolar binding affinity was selected  
87 based on binding and inhibition assays. Binding affinity of the selected lead was further  
88 increased by two-orders of magnitude through mutual feedback between computational and  
89 experimental approaches. We demonstrated the utility of our approach by determining the  
90 binding interface of the developed protein binder through its crystal structure in complex with  
91 the HER2 domain IV. Details are reported herein.

92

93

94

95

96

97

98

99

100

101

102

103

104

105



113

## 114 **Results**

### 115 **Computationally-guided design of protein binders targeting a specific site on HER2** 116 **domain IV**

117 As proof-of-concept, we aimed to develop a protein binder which targets the trastuzumab  
118 epitope on HER2 domain IV and consequently inhibits a HER2-mediated cell signaling. HER2  
119 has no receptor ligands, and triggers cell signaling through homo- or heterodimerization with  
120 ErbB protein family (Baselga and Swain 2009). Interestingly, domain IV of all epidermal  
121 growth factor receptors is known to consist of structurally flexible loops (Banappagari, Ronald,  
122 and Satyanarayanajois 2010; Arkhipov et al. 2013), which may hinder computational design of  
123 a protein binder targeting such site. Monoclonal antibody trastuzumab was revealed to bind to  
124 the domain IV of HER2, and effectively inhibit a related cell-signaling process (Tebbutt,  
125 Pedersen, and Johns 2013; Arkhipov et al. 2013). Thus, while extremely challenging, potential  
126 therapeutic protein inhibitors should bind to a designated site of HER2 to have expected  
127 outcomes, when considering the molecular mechanism of the cell signaling. As a model, a  
128 protein scaffold composed of LRR (Leucine-rich repeat) modules, termed ‘Repebody’, was  
129 employed. The repebody scaffold showed desirable biochemical and physical properties such  
130 as high stability, easy module-based engineering, high bacterial expression, and high tissue  
131 penetration (Lee et al. 2012). A number of target-specific repebodies have been developed  
132 through phage display selection (Lee et al. 2014; Lee et al. 2015; Hwang et al. 2016). In  
133 particular, the target-binding region of the scaffold is composed of  $\beta$ -strands, exhibiting a rigid-  
134 body structure (Lee et al. 2012).

135 To successfully design a protein binder recognizing a target site through a  
136 computational method, the shape complementarity between a protein binder and a target site

137 should be taken into consideration. As the shape complementary of a repebody may not exactly  
138 fit the entire trastuzumab epitope on HER2 domain IV, we estimated the chance of the overlap  
139 with the trastuzumab epitope by a repebody. Assuming that a library approach generates  
140 variants that can bind to any sites of HER2 domain IV, we generated 100,000 random docking  
141 models by assigning attraction on two nearby LRR modules, LRRV3 and LRRV4, of the  
142 repebody (**Figure 3a**). For this, the Rosetta docking protocol was employed (Weitzner et al.  
143 2017). The simulation results show that 100 % overlap with the trastuzumab epitope using a  
144 repebody may not be possible (**Supplementary Figure S1**). In fact, nearly a half of the  
145 repebody models are not in contact with the epitope at all. Considering the shape  
146 complementarity and steric clashes against trastuzumab for inhibiting the cell signaling, an  
147 effective repebody should contain at least  $> 20$  % of the trastuzumab epitope. We thus first  
148 generated complex model structures using ClusPro (Kozakov et al. 2017) with the antibody  
149 mode (Brenke et al. 2012) (while not particularly considering the trastuzumab epitope at this  
150 stage). Wild-type repebody (PDB ID: 3RFS) was docked onto the target site on domain IV of  
151 HER2 (PDB ID: 1N8Z) with repulsion constraints at HER2 domain I-III and the convex region  
152 of the repebody (**Figure 2a, b**). Total 30 docking models were generated for the target site on  
153 the HER2 domain IV. Each LRR module has four variable sites, and 20 variable sites in total  
154 on five modules of wild-type repebody were subjected to redesign based on the docking models  
155 using RosettaScript protocol (Fleishman, Leaver-Fay, et al. 2011). Only domain IV was  
156 considered in the Rosetta redesign process, and one thousand designs were generated for each  
157 docking model. Both proline and cysteine were excluded in the design process. Among the  
158 30,000 designs, top 10 clones with the lowest energy values and those which appeared to share  
159  $> 20$  % of the trastuzumab epitope were selected. It should be noted that one of the initial  
160 docking models that share the epitope is very similar to the crystal structure of Rb-H2 in  
161 complex with the domain IV (**Supplementary Figure S2**). The selected clones were expressed



162 in *E. coli* and subjected to purification, followed by binding assays using ELISA against the  
163 HER2 ectodomain (**Supplementary Figure S3**). We finally selected Rb-H0 as a lead showing  
164 the highest binding signal to HER2 ectodomain. There was a 5-fold signal decrease in the  
165 presence of trastuzumab (**Figure 2c**), which indicates that Rb-H0 shares the trastuzumab  
166 epitope. To estimate the binding affinity of Rb-H0, we analyzed the binding profile against  
167 HER2 using direct ELISA with the increasing concentration of Rb-H0. As a result, the binding  
168 affinity of Rb-H0 was estimated to be 4  $\mu$ M (**Figure 3b**).

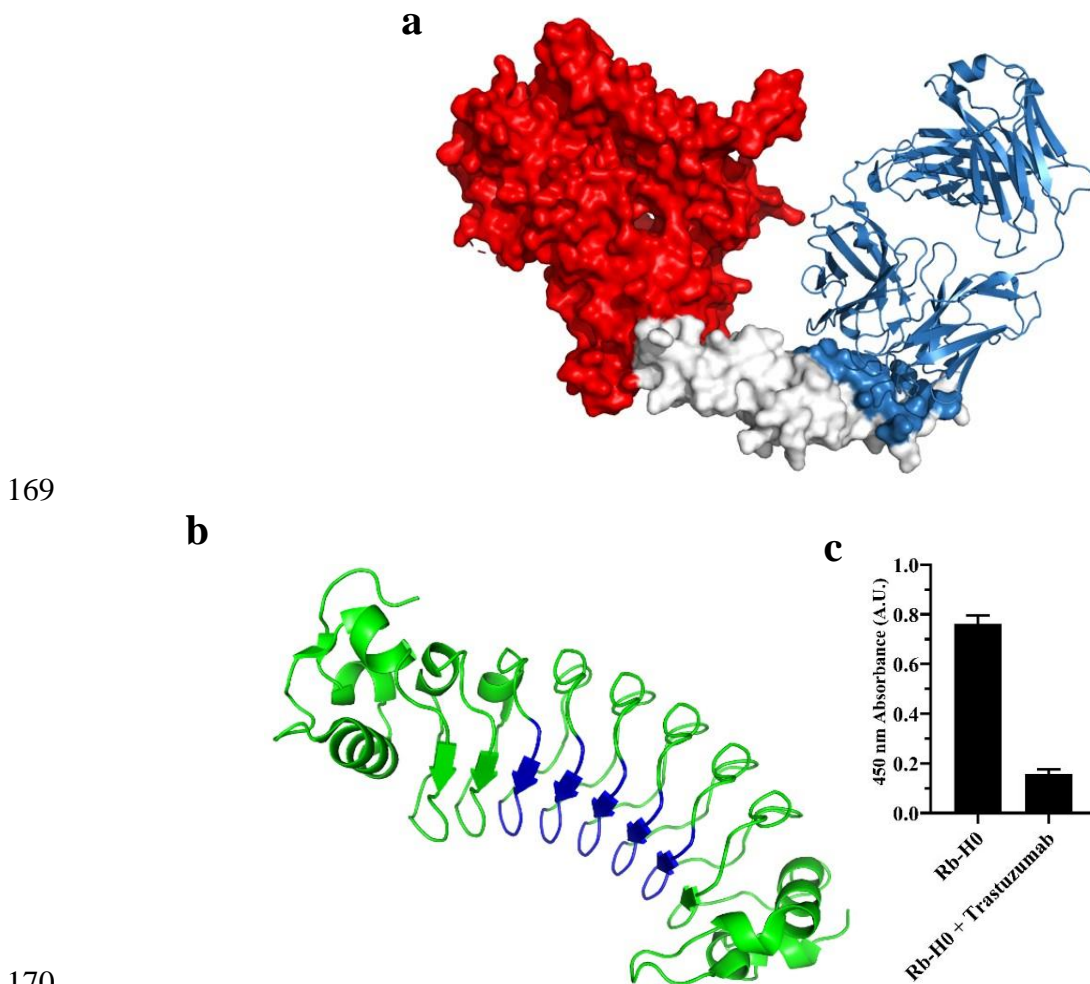

171 **Figure 2. Selection of Rb-H0 binding to HER2 domain IV from the computationally**  
172 **designed protein binders. a**, Initial docking models were generated on HER2 domain IV with  
173 assigned repulsion on domain I-III (red). Trastuzumab and its epitope are colored in skyblue.  
174 **b**, Non-concave region of a rebody model (PDB ID: 3RFS chain A) was masked (blue). **c**,

175 Selection of Rb-H0 from the computationally designed candidates. Among top 10 designs  
176 showing the lowest energy levels, Rb-H0 exhibiting the highest signal and significant decrease  
177 in the signal in the presence of trastuzumab was selected as the initial binder. Error bars  
178 represent average  $\pm$  standard deviation (n = 3).

179

180

181

### 182 **Affinity improvement by an integrated computational and experimental approach**

183 Since Rb-H0 has a low binding affinity for HER2 ectodomain, we intended to increase its  
184 binding affinity. Based on the docking models of wild-type reepody against HER2 domain  
185 IV, we reasoned that the residues at modules LRRV3 and LRRV4 on Rb-H0 would have the  
186 highest proximity for the targeted site on HER2 domain IV. Seven residues (Ile114, Asp116,  
187 Ser118, Asn119, Ile138, Asp140, Ser142) were selected and randomized for a library  
188 construction followed by phage display selection (**Figure 3a**). A clone with the highest binding  
189 signal, designated as Rb-H1, was shown to have a significantly increased binding affinity  
190 compared with Rb-H0 (**Figure 3b**). For the second round of affinity maturation, we predicted  
191 the binding mode of Rb-H1 to the HER2 domain IV using the computational method as  
192 described elsewhere (Choi et al. 2019). It should be noted that the computational binding mode  
193 prediction requires solid experimental validation in advance (paratope information and clues  
194 on epitopes) and thus Rb-H0 binding mode prediction may not be performed. In the docking  
195 process, ClusPro with the antibody mode was employed for protein docking (Kozakov et al.  
196 2017; Brenke et al. 2012). Rb-H1 structure was modeled based on wild-type reepody structure  
197 (PDB ID: 3RFS), and repulsion was assigned on the convex residues. Attraction was imposed  
198 on the library sites for affinity improvement. As it was known from the competitive binding  
199 assay that Rb-H1 might share the epitope with trastuzumab, any docking models that were not  
200 in contact with the trastuzumab epitope were eliminated. Total 17 docking models were finally

201 selected, followed by energy-minimization using the Tinker molecular dynamics package  
202 (Rackers et al. 2018) (AMBER99sb (Hornak et al. 2006) with the GB/SA implicit solvent  
203 model (Still et al. 1990)), and the docking model with the lowest energy was predicted to be  
204 the binding mode of Rb-H1 (Choi et al. 2019) (**Supplementary Figure S4**). Based on the  
205 predicted binding mode, another seven residues (Gln46, Ile48, Asn50, Asn51, Tyr68, Ala70,  
206 Val90) on the three modules LRR1, LRRV1 and LRRV2, at the N-terminus were chosen and  
207 randomized for a library construction and phage display selection (**Figure 3a**). As a result, a  
208 variant with the highest signal, Rb-H2, was selected, and it was observed to have a marginal  
209 increase in binding affinity compared with Rb-H1 (**Figure 3b**). The binding affinity of Rb-H2  
210 was determined to be 54 nM through surface plasmon resonance (SPR) (**Figure 3c**) which is a  
211 significant increase in the binding affinity of a lead protein binder by two-orders of magnitude.

212 After the second-round affinity-maturation, however, only a marginal increase in the  
213 binding affinity of Rb-H2 was observed despite seven additional mutations. Amino acid  
214 sequence of Rb-H0, Rb-H1, and Rb-H2 are shown in **Supplementary Table S1**. Given that  
215 information, we assumed that only certain mutations would contribute to the increase in the  
216 binding affinity of Rb-H1. We analyzed the binding energy for each single mutant of Rb-H2  
217 based on the model complex for Rb-H1 (**Supplementary Table S2**). The energy calculation  
218 results indicate that two single mutations (V90T and N51H) make significant contributions to  
219 the increase in the binding affinity. By taking into account the calculation results, we remodeled  
220 the binding mode of Rb-H2 again by assigning attractions at the two predicted positions (V90T  
221 and N51H). After energy minimization, the final model was shown to be well coincident with  
222 the X-ray crystal structure (I-RMSD: 1.701 Å,  $f_{\text{nat}}$ : 0.508, **Supplementary Figure S4**).

223 To further get insight into the binding site and affinity of the variants, competitive  
224 ELISA was carried out for Rb-H0, Rb-H1, and Rb-H2 in the presence of trastuzumab (**Figure**  
225 **4a**). The signals of the variants were shown to decrease in the presence of trastuzumab,

226 indicating that they share the trastuzumab epitope as intended and predicted. In the case of Rb-  
227 H2, the signal decrease was much smaller compared to Rb-H0, supporting a significant increase  
228 in binding affinity, considering the binding affinity of trastuzumab for HER2 domain IV (5 nM  
229 ('Herceptin (Trastuzumab) [package insert]. U.S. Food and Drug Administration' 1998)). We  
230 tested the specificity of Rb-H2 against ErbB family proteins with high structural similarity to  
231 HER2, including EGFR, HER2, HER3, and HER4. As a result, Rb-H2 showed the highest  
232 binding specificity for HER2 ectodomain (**Figure 4b**). Finally, we checked whether Rb-H2  
233 forms a complex with HER2 ectodomain using size exclusion chromatography (**Figure 4c**).  
234 Rb-H2 in complex with HER2 ectodomain was eluted as a single peak at a designated position,  
235 confirming the complex formation between Rb-H2 and HER2 ectodomain. In addition, we  
236 double confirmed the complex formation between Rb-H2 and HER2 domain IV in gel filtration  
237 chromatography (Data not shown). The results support that Rb-H2 indeed shares a binding site  
238 on HER2 domain IV with trastuzumab as intended.

239

240

241

242

243

244

245

246

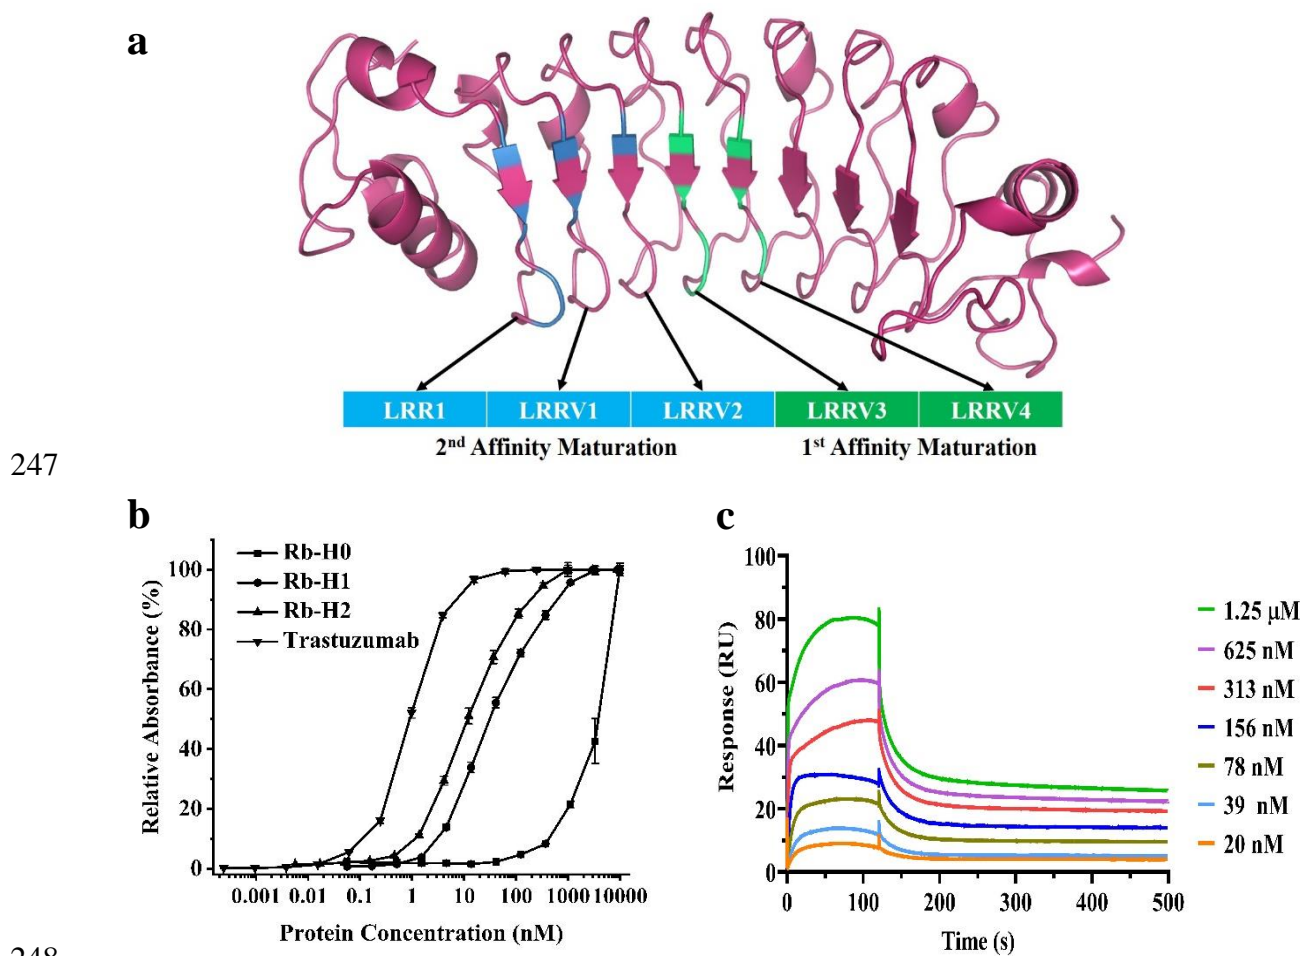

249 **Figure 3. Computationally-guided affinity improvement of Rb-H0 and biophysical**  
250 **properties of affinity-maturated Rb-H2. a**, Modules used in the first and second round of  
251 affinity maturation of Rb-H0 are shown in representative structure of a rebody scaffold.  
252 Annotation of the modules is indicated, and each module is numbered from N-terminus to C-  
253 terminus. Seven residues in modules LRRV3 and LRRV4 were used for first-round affinity  
254 maturation. Additional seven residues on modules LRR1, LRRV1, and LRRV2 were optimized  
255 for second round affinity maturation. **b**, Binding profiles of Rb-H0 and affinity-maturated Rb-  
256 H1 and Rb-H2 by ELISA. Error bars represent average  $\pm$  standard deviation ( $n = 3$ ). **c**,  
257 Determination of binding affinity of Rb-H2 for HER2 ectodomain through surface plasmon  
258 resonance (SPR).

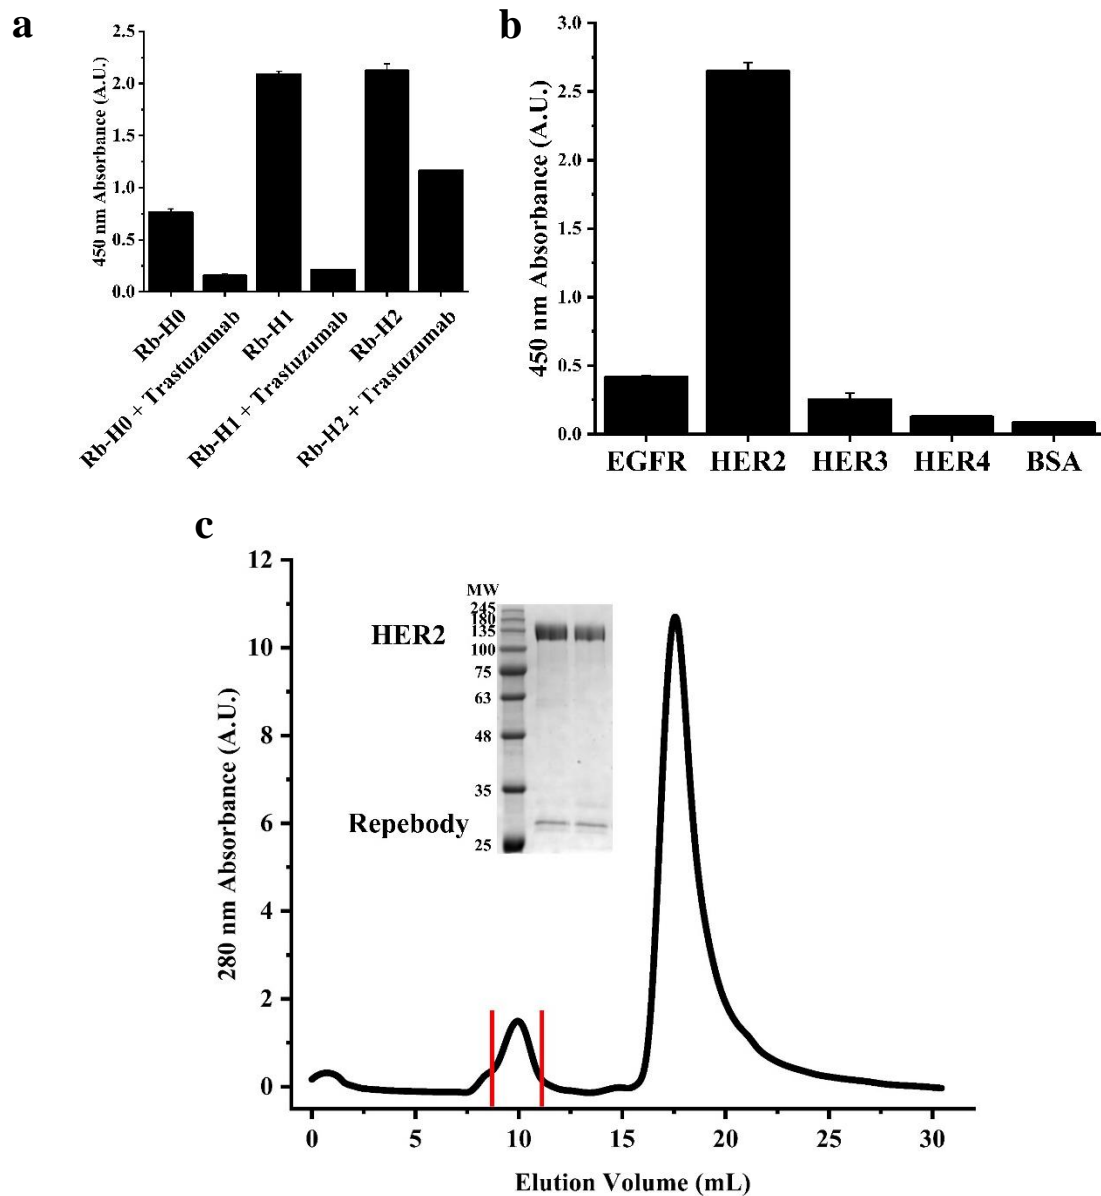

259

260

261 **Figure 4. Characteristics of affinity-matured Rb-H2.** **a**, Competitive inhibition assays of  
262 Rb-H0, Rb-H1 and Rb-H2 in the presence of trastuzumab. All the binders showed decreased  
263 signals in the presence of trastuzumab. Error bars represent average  $\pm$  standard deviation ( $n =$   
264 3). **b**, Specificity of Rb-H2 against ErbB family proteins. Rb-H2 was able to distinguish HER2  
265 among the ErbB family proteins. Error bars represent average  $\pm$  standard deviation ( $n = 3$ ). **c**,  
266 Complex formation between Rb-H2 and HER2 ectodomain. Two proteins were mixed and  
267 eluted through size exclusion chromatography. Two proteins were eluted together in the first  
268 fraction as shown in SDS-PAGE (inset).

269

270



## 271 X-ray crystal structure of Rb-H2 in complex with HER2 domain IV

272 To confirm the binding site of Rb-H2, we determined the X-ray crystal structure of Rb-H2 in  
273 complex with HER2 domain IV at 2.03 Å resolution (**Figure 5a, c**). The crystallographic and  
274 refinement statistics are shown in **Supplementary Table S3**. Rb-H2 is shown to bind to the  
275 targeted site of HER2 domain IV containing the trastuzumab epitope. The interface area  
276 between Rb-H2 and HER2 domain IV was estimated to be 2,070 Å<sup>2</sup>, whereas the interface area  
277 of trastuzumab is about 1,958 Å<sup>2</sup>. The binding site of Rb-H2 overlaps with that of the  
278 trastuzumab, covering approximately one-fourth of the trastuzumab epitope, which resulted in  
279 the binding competition against trastuzumab. Structural analysis revealed that HER2 domain  
280 IV interacts primarily with the concave side of Rb-H2 through hydrophobic interactions,  
281 hydrogen bonds and salt-bridge. Thr137 of Rb-H2 forms hydrogen bond with Gly572 of HER2  
282 domain IV, and Trp116 and Arg140 of Rb-H2 have hydrophobic interactions with Val546,  
283 Leu547 and Val574 of HER2 domain IV (**Figure 5e**). In addition, Arg240 of Rb-H2 forms a  
284 salt bridge with Asp582 of HER2 domain IV, and four residues (Lys185, Tyr210, Arg240 and  
285 Gly244) of Rb-H2 have hydrogen bonds with four residues (Val585, Cys584, Asp582 and  
286 Gln583) of HER2 domain IV, respectively (**Figure 5f**). Specifically, three residues (Ser48,  
287 His51 and Tyr70) of Rb-H2 form hydrogen bonds with three residues (Glu543, Gln533, and  
288 Gln548) of HER2 domain IV (**Figure 5d**). Val162, Tyr210 and Trp212 of Rb-H2 are shown to  
289 have hydrophobic interactions with Ser573, Phe577 of HER2 domain IV (**Figure 5e**). It is  
290 interesting to note that some amino acid residues of Rb-H2 mentioned above (Ser48, His51,  
291 Tyr70, Trp116 and Arg140) are changed from those of Rb-H0. Overall, our structural analysis  
292 supports the significantly improved binding affinity of Rb-H2 for HER2 domain IV by two-  
293 orders of magnitude. Furthermore, based on the structure of HER2 domain IV, the binding  
294 region of Rb-H2 overlaps with the epitope of trastuzumab as shown in **Figure 5a** and **5b**. The  
295 binding surface areas of HER2 domain IV/Rb-H2, HER2 domain IV/ trastuzumab and the

296 overlapped area are as follows: 2,070 Å<sup>2</sup>, 1,958 Å<sup>2</sup> and 481 Å<sup>2</sup> (23 % of the trastuzumab  
297 epitope), respectively. The overlapped residues between HER2 domain IV/Rb-H2 and HER2  
298 domain IV/trastuzumab include Phe577, Asp582, Gln583 and Lys591 of HER2 (**Figure 5b**)  
299 (Cho et al. 2003). Based on our initial docking simulation (**Supplementary Figure S1**), the  
300 probability that a reepody generated from a random library approach shares > 23 % of the  
301 trastuzumab epitope is 0.3. The results provide distinct insight into the utility and potential of  
302 our computational-driven design approach.

303

304

305

306

307

308

309

310

311

312

313

314

315



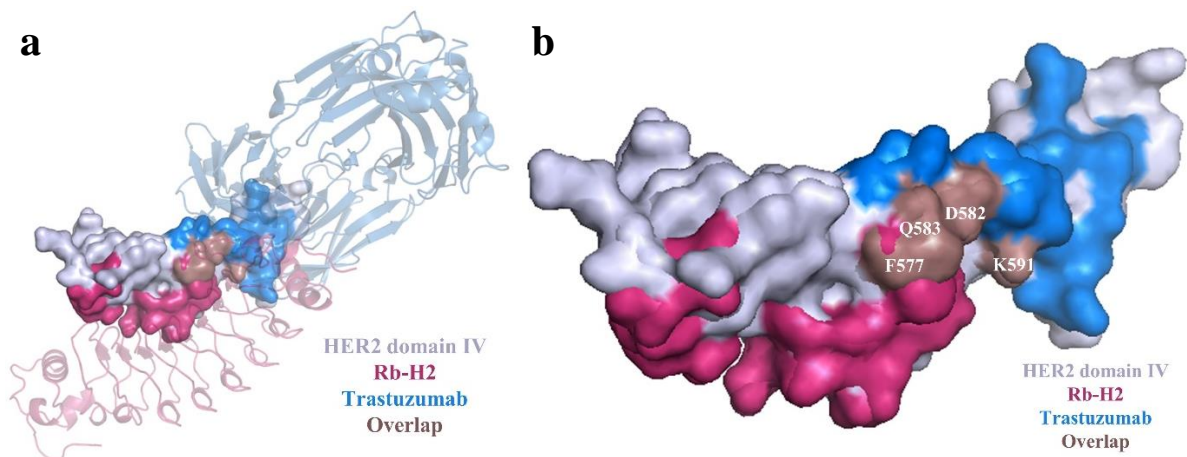

316

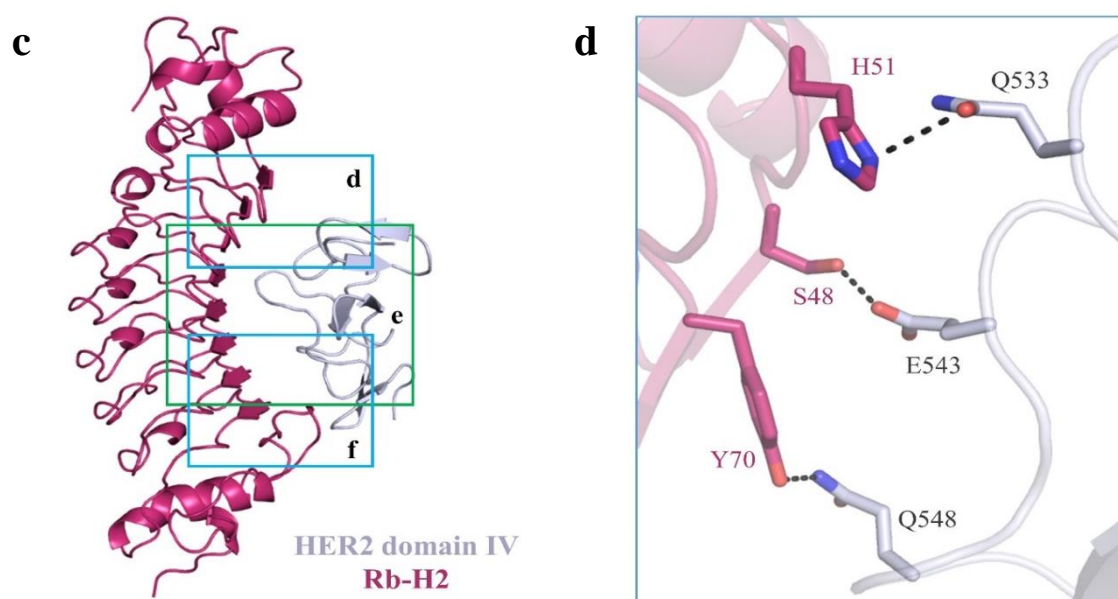

317

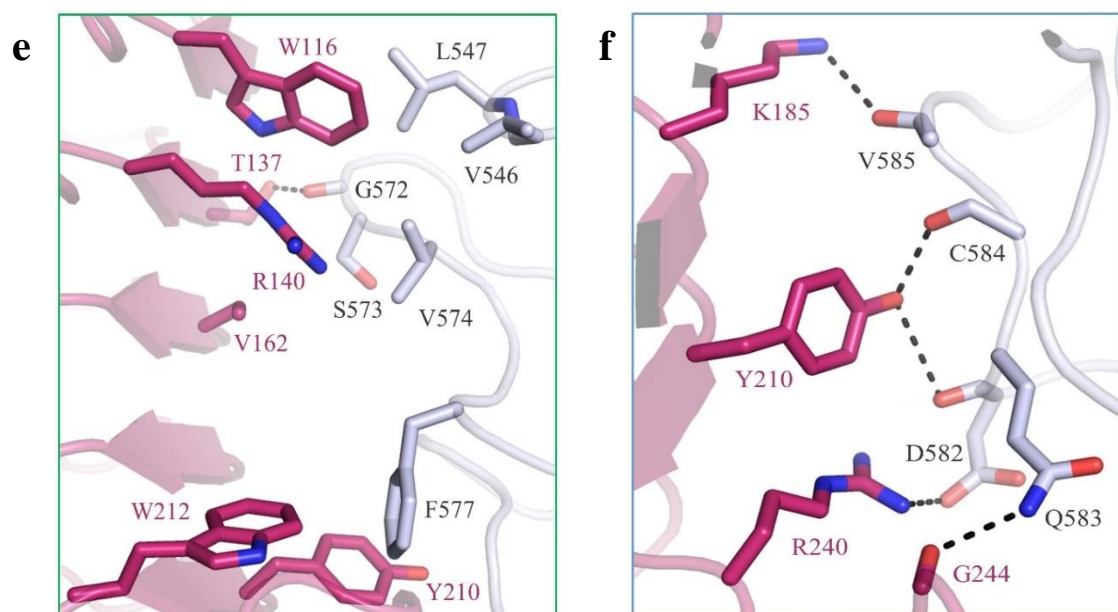

318

319 **Figure 5. Crystal structure of Rb-H2 in complex with HER2 domain IV.** **a**, Overall  
320 structure of Rb-H2 in complex with HER2 domain IV. The complex structure of trastuzumab  
321 in complex with HER2 domain IV is also shown. HER2 domain IV is presented in surface  
322 model, and Rb-H2 and trastuzumab are in cartoon model. Two structures are superimposed  
323 based on HER2 Domain IV. (HER2 domain IV: bluewhite, Rb-H2: warmpink, trastuzumab:  
324 skyblue, overlapped: dirtyviolet). **b**, Binding regions on HER2 domain IV of Rb-H2 and  
325 trastuzumab. The overlapped residues are marked. **c**, Overall structure of Rb-H2 in complex  
326 with HER2 domain IV. Rb-H2 and HER2 domain IV are presented in cartoon model. Three  
327 interaction regions are represented in detail in **d-f**. **d**, Hydrogen bonds are shown in dashed  
328 lines in stick model. **e**, Hydrogen bonds are shown in dashed lines in stick model and  
329 hydrophobic interaction residues are presented in stick model. **f**, Hydrogen bonds and salt-  
330 bridge are shown in dashed lines in stick model.

331

### 332 *In vitro* binding and cytotoxicity of Rb-H2

333 We examined the binding of the developed Rb-H2 to HER2 on the cell surface. For this, cancer  
334 cell lines expressing different levels of HER2 were tested, including Sk-Br3 (high expression),  
335 Sk-Ov3 (moderate), and MCF-7 (low). We labeled Rb-H2 with fluorescein isothiocyanate  
336 (FITC) and treated it with the cells followed by imaging using confocal microscope. As shown  
337 in **Figure 6a**, the strong fluorescence intensity was observed on the peripheral region of Sk-  
338 Br3 cells, whereas MCF-7 cells exhibited the lowest fluorescent intensity. Based on the result,  
339 it is evident that Rb-H2 binds to HER2 ectodomain on the cell surface. No fluorescence was  
340 detected when an off-target rebody (human serum albumin specific rebody (Kim et al.  
341 2019)) labeled with fluorescein was treated with each cell line, supporting the specific binding  
342 of Rb-H2 to HER2 ectodomain on the cell surface.

343 Since Rb-H2 was developed by targeting the trastuzumab epitope on HER2 domain IV,  
344 it is expected to inhibit the HER2-mediated cell signaling as trastuzumab does. We tested the  
345 cytotoxicity of Rb-H2 for various cancer cell lines (**Figure 6b**). In the case of Sk-Br3, cell  
346 viability gradually decreased with the increasing concentration of Rb-H2 and reached 70 % at

347 the concentration of 1  $\mu$ M. Similar cytotoxicity was observed for Sk-Ov3 and MCF-7, even  
348 though their HER2 expression levels were lower than Sk-Br3. Rb-H2 was shown to exhibit a  
349 similar cytotoxic pattern to trastuzumab for the tested cell lines, implying that it inhibits the  
350 cell signaling process in a similar way to trastuzumab because it shares the binding site with  
351 trastuzumab. Trastuzumab is clinically used for treatment of breast cancer and showed a  
352 saturation pattern even at high concentration. It is evident that Rb-H2 binds to the targeted site  
353 of HER2 domain IV and consequently inhibits the cell signaling pathway as trastuzumab by  
354 blocking dimerization, suppressing the cell proliferation.

355

356

357

358

359

360

361

362

363

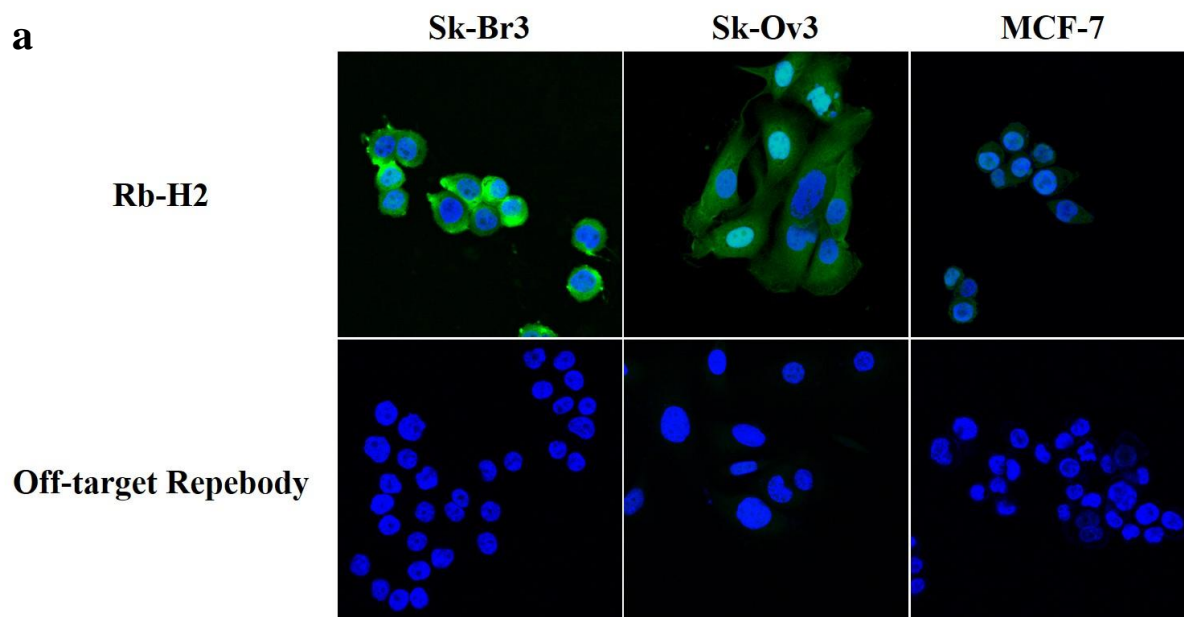

364

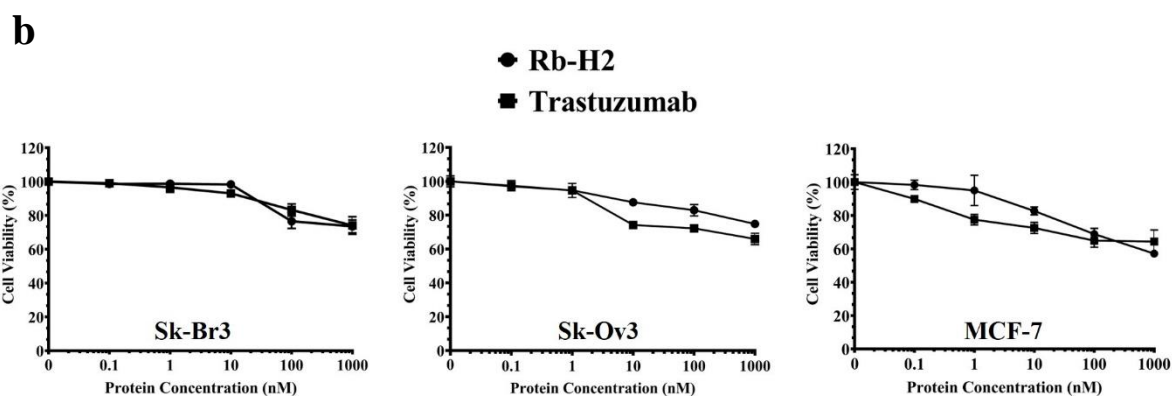

365

366 **Figure 6. Binding of Rb-H2 to HER2-expressing cells and its cytotoxicity *in vitro*.** a,  
367 Confocal microscopic images of HER2-expressing cancer cell lines after treatment with  
368 fluorescein-labeled Rb-H2. Cells were treated with 1  $\mu$ M of labeled Rb-H2 for 3 h at 37  $^{\circ}$ C and  
369 imaged by confocal microscopy. Sk-Br3 (high level of HER2 expression, top), Sk-Ov3  
370 (moderate HER2 level, middle), and MCF (low HER2 expression, down) cells were used. b,  
371 *In vitro* cytotoxicity of Rb-H2. Cells expressing HER2 were treated with Rb-H2 or trastuzumab  
372 at different concentrations for 72 h, and cell viability was determined by CCK-8 assay. Error  
373 bars represent average  $\pm$  standard deviation (n = 3).

374

375

376

377

## 378 **Discussion**

379 We demonstrated computationally-guided design and affinity improvement of a protein binder  
380 recognizing a specific site on domain IV of HER2. Rational design of a protein binder with a  
381 desired epitope and binding affinity has been a long-standing goal in protein engineering field.  
382 Our strategy involves the computational design of protein binders which appeared to recognize  
383 a target site, followed by selection of potentially effective binders through experimental  
384 binding assays. As proof-of-concept, we aimed to design a protein binder which target the  
385 trastuzumab epitope on HER2 domain IV. The domain IV has very little content of secondary  
386 structures, which is supposed to be “non-ideal” features to be targeted by computational design  
387 approach. It has been shown that high flexibility of the domain makes it even harder to  
388 computationally design a protein binder recognizing such domain (Whitehead, Baker, and  
389 Fleishman 2013). Nonetheless, our approach enabled a successful design of a protein binder  
390 recognizing a target site on domain IV of HER2 as intended.

391         Epitope and binding affinity of a protein binder is crucial for its therapeutic efficacy.  
392 Development of a protein binder with a desirable epitope and binding affinity has mostly relied  
393 on experimental approaches comprising repeated rounds of a library construction and screening,  
394 but they are labor-intensive and difficult to identify the binding epitope during experiments.  
395 Recently, computational methods have shown notable successes in the design of proteins with  
396 desired functions due to many advances in the computing power and algorithms. However,  
397 purely computational design of a protein binder targeting a specific site still remains a  
398 challenge mainly because the current computational energy scoring is not accurate enough to  
399 precisely predict the binding free energy landscapes and may not be generally applicable.  
400 Furthermore, if a target protein is composed of multi-domains like extracellular receptors,  
401 computational design of such protein binders becomes extremely difficult. Our

402 computationally-guided approach effectively generated the protein binder candidates for each  
403 docking model between a protein scaffold and HER2 domain IV by taking into consideration  
404 of shape complementarity. The docking models showed that a perfect overlap with the  
405 trastuzumab epitope using a rebody would be impossible as expected. Considering the shape  
406 complementarity and steric clashes against trastuzumab for inhibiting the cell signaling, we  
407 reasoned that an effective design should share at least > 20 % of the trastuzumab epitope. With  
408 this criterion, total 30 docking models were generated for the target site on the HER2 domain  
409 IV, and 20 variable sites of wild-type rebody were computationally redesigned for each  
410 model using RosettaScript protocol. Our computationally-guided approach eventually enabled  
411 a lead with a low micromolar affinity among the 30,000 designs. Based on the results, it is  
412 likely that shape complementarity is critical to the design of protein binder recognizing a target  
413 site. Experimental affinity improvement of a protein binder is generally known to be laborious  
414 and time-consuming. In contrast, our combined computational and experimental approach was  
415 shown to be effective for significantly enhancing the affinity of an initial binder, proving its  
416 utility for affinity improvement.

417         The X-ray crystal structure of Rb-H2 in complex with HER2 domain IV validated  
418 the utility of our approach by confirming that Rb-H2 indeed binds to the target site on HER2  
419 domain IV as intended, showing the overlap (approximately one fourth) with the trastuzumab  
420 epitope. It is interesting to note that the computationally predicted binding orientation of Rb-  
421 H2 against HER2 domain IV was well coincident with the X-ray crystal structure, which  
422 supports the utility of the computational method to model the binding mode (Choi et al. 2019).  
423 Binding of Rb-H2 to the HER2-expressing cells and its *in vitro* cytotoxicity also supported the  
424 potential of our approach. Taken together, the present strategy can be widely applied to the  
425 development of a protein binder with a desired epitope and binding affinity for a target protein  
426 as an alternative to conventional experimental methods.



427

## 428 **Materials and Methods**

### 429 **Synthesis and expression of genes**

430 Computationally designed reebody genes and primers used for phage display library were  
431 synthesized from Integrated DNA Technologies (Coralville, IA, USA). Synthesized gene  
432 fragments went through cloning process after overnight digestion with restriction enzymes  
433 (Nde I, Xho I) at 37 °C and ligation (T4 DNA Ligase, Takara Bio, Shiga, Japan) into pET21  
434 vector (Novagen, Madison, WI, USA) at room temperature for 2h. Materials for bacterial  
435 culture were supplied from Duchefa (Haarlem, The Netherlands). Origami B (DE3) competent  
436 cells (Novagen) were used for reebody expression. Isopropyl  $\beta$ -D-1-thiogalactopyranoside  
437 (IPTG) was purchased from LPS Solution (Seoul, Korea). The Ni-NTA agarose resin for  
438 purification of his-tagged proteins was purchased from Qiagen (Germantown, MD, USA).  
439 Superdex 75 16/600 and Superdex 200 Increase 10/300 size exclusion chromatography  
440 columns were purchased from GE Healthcare (Uppsala, Sweden). All other reagents including  
441 buffers and solvents were of analytical grade.

442

### 443 **Phage display selection**

444 A reebody library was constructed by overlap PCR using primers containing NNK codon for  
445 variable sites on each module. The resulting library was inserted into pBEL118N phagemid  
446 (Lee et al. 2012) and electroporated to TG1 Electroporation-Competent Cells (Agilent  
447 Technologies, Santa Clara, CA, USA). Phages containing the library were rescued using  
448 M13KO7 Helper Phage (New England Biolabs, Ipswich, MA, USA). Solution-phase bio-  
449 panning was conducted in order to minimize the disruption of a target protein. Briefly, 10  $\mu$ L  
450 of Dynabeads M-280 Streptavidin (Invitrogen, Waltham, MA, USA) was loaded into a sterile

451 1.5 mL centrifuge tube for immobilization of a target protein, and 40  $\mu$ L of Dynabeads were  
452 added to another tube for a negative selection. After washing the beads with PBS (pH.7.4)  
453 twice by brief vortex, biotinylated HER2 ectodomain (4  $\mu$ g/mL, Sino Biological, Beijing,  
454 China) was added to the tube and incubated for 2 h at 4 °C. Both HER2 ectodomain-bound  
455 beads and negative selection beads were blocked with PBST (PBS pH 7.4, 0.05% Tween 20)  
456 containing 2% BSA for 2 h at 4 °C. Phages were prepared in PBST containing in 1% BSA at a  
457 final phage concentration of  $1.0 \times 10^{12}$  cfu/mL and mixed with negative selection beads for 1  
458 h. Purified Rb-H0 or Rb-H1 protein was also added to the phage solution in 1  $\mu$ M concentration  
459 for competition. Phage solution was separated from the beads using a magnet and added to  
460 HER2 ectodomain-bound beads. After 2 h incubation at room temperature, beads were isolated  
461 by using magnetic bar and incubated for 1 min with PBST. This process was repeated five  
462 times and finally washed with PBS. To disrupt the binding between a target protein and phage-  
463 displayed reebody, 0.2 M glycine-HCl solution (pH 2.2) was added. Beads were isolated by  
464 a magnetic bar, and 1M Tris solution (pH 9.0) was added to the supernatant for neutralization  
465 before mixing with TG-1 cells. Phage-infected TG-1 cells were grown in 2xYT agar plate  
466 supplemented with 100  $\mu$ g/mL ampicillin and 1% glucose for overnight at 30 °C. On the  
467 following day, 2xYT media were added into the plates to gather the cells and used for next  
468 round of selection process. Total five rounds of selection process were conducted for  
469 enrichment of positive clones. After the 5<sup>th</sup> round, cells were diluted at appropriated ratio with  
470 PBS (pH 7.4) before plated. On the following day, a 96 deep-well plate (Axygen Scientific,  
471 Corning, NY, USA) was seed with colonies and the resulting phages were acquired for phage  
472 ELISA as described in our previous work (Kim et al. 2019). Phages were detected by HRP-  
473 conjugated anti-M13 antibody (GE Healthcare). For signal generation, 3,3' 5,5'-  
474 tetramethylbenzidine (TMB) (Sigma Aldrich, St. Louis, MO, USA) was used, and the reaction



475 was stopped by addition of 1N H<sub>2</sub>SO<sub>4</sub>. Absorbance at 450 nm was measured with Infinite M200  
476 microplate reader (Tecan, Crailsheim, Germany).

477

#### 478 **Computational design and affinity maturation of a site-specific repebody**

479 Initial binding orientations were generated using the ClusPro webserver with the antibody  
480 mode (Brenke et al. 2012). Wild-type repebody (PDB code: 3RFS) was used as a receptor, and  
481 the crystal structure of HER2 (1N8Z) was employed as a ligand. The amino acid residues at  
482 the convex region were assigned to be repulsive. The residues of the trastuzumab epitope on  
483 HER2 domain IV were defined using PyMol from the X-ray crystal structure of trastuzumab  
484 in complex with HER2 ectodomain (1N8Z). Any residues on HER2 ectodomain within 5 Å  
485 from trastuzumab were defined as epitopes, and attraction was imposed. As a result, 30 binding  
486 models were generated. Rosetta 3.6 (2016.34) with talaris2014 was employed to redesign the  
487 binding sites of a repebody toward HER2 domain IV for each binding model (Fleishman,  
488 Leaver-Fay, et al. 2011; O'Meara et al. 2015). All amino acid types except for cysteine and  
489 proline were allowed at each position. For each model, 1,000 designs were generated, and the  
490 top 10 designs with the lowest energy values among the 30,000 designs were selected for  
491 further tests. The binding mode prediction was performed using the TINKER molecular  
492 dynamics package (Rackers et al. 2018). The AMBER99sb with the GB/SA implicit solvent  
493 model was used to minimize the model (Hornak et al. 2006; Still et al. 1990). For computer-  
494 guided affinity maturation, the residues were selected to increase the interaction with HER2  
495 domain IV based on predicted binding modes. Selected residues were randomized to generate  
496 a library for phage display, and a clone with highest binding affinity was selected using phage  
497 ELISA. The same procedure was repeated to further increase the binding affinity of a selected  
498 repebody.

499

## 500 **Enzyme-linked immune-sorbent assay (ELISA)**

501 Binding property of designed and selected reepodies were analyzed by direct ELISA. Briefly,  
502 a 96-well Maxibinding plate was coated with extracellular domain of HER2 at 4 °C overnight.  
503 PBST containing 1% BSA was used for blocking and dilution of reepodies and antibodies.  
504 PBST was used as washing buffer throughout the process. The reepody was detected by using  
505 HRP-conjugated anti-c-Myc antibody (1:500 dilution, Santa Cruz Biotechnology, Dallas, TX,  
506 USA) or biotinylated anti-reepody antibody (1 µg/mL, AbClon, Seoul, Korea) and HRP-  
507 conjugated streptavidin (1:1000 dilution, BioLegend, San Diego, CA, USA). For trastuzumab  
508 (Herceptin), HRP-conjugated anti-human Fc antibody (1:10000 dilution, Sigma Aldrich) was  
509 used. TMB solution was used for a signal generation and the reaction was stopped using 1N  
510 H<sub>2</sub>SO<sub>4</sub>. The signals were measured at 450 nm by microplate reader, and absorbance from  
511 maximum concentration was converted to 100 % for comparison. For binding specificity test  
512 against ErbB family proteins, EGFR, HER3 and HER4 proteins were used (Sino Biological).

513

## 514 **Surface plasmon resonance (SPR)**

515 Binding affinity of a reepody was determined through surface plasmon resonance (Biacore  
516 T200, GE Healthcare). Briefly, 250 µg/mL of NeutrAvidin Protein (Thermo Scientific,  
517 Waltham, USA) was first coated on the surface of CM5 chip (GE Healthcare) in 10 mM sodium  
518 acetate buffer (pH 4.5). After immobilization, 20 µg/mL of biotinylated HER2 ectodomain was  
519 injected into the chip. Sensograms were obtained by flowing a serially diluted reepody into  
520 the chip. Kinetic constants were determined by the 1:1 Langmuir binding model using Biacore  
521 T200 software (GE Healthcare).

522

## 523 **Size exclusion chromatography for the complex formation**

524 20 µg of HER2 ectodomain from Abcam (Cambridge, UK) was mixed with 5-fold excess  
525 amount of a reepbody and incubated at 4 °C overnight. The mixtures were injected into  
526 Superdex 200 increase 10/300 column for analysis. The peak fractions were analyzed by SDS-  
527 PAGE.

528

#### 529 **Expression and purification of HER2 domain IV**

530 HER2 domain IV which corresponds to residues from 531 to 626 of HER2 was expressed using  
531 insect cells. HER2 gene was subcloned into a baculovirus expression vector by adding Mellitin  
532 signal peptide sequences and nona-histidine tag to the N-terminal of HER2 domain IV and  
533 TEV cleavage site and maltose-binding protein (MBP) tag to the C-terminal of HER2 domain  
534 IV. The expression of HER2 domain IV in insect cells was carried out using a Bac-to-Bac®  
535 Baculovirus Expression System (Invitrogen). The resulting construct was expressed in  
536 *Spodoptera frugiperda* (Sf9) insect cells in a secreted form through a culture at 27°C for 3 days.  
537 The media containing secreted HER2 domain IV were collected through centrifugation to  
538 remove Sf9 cells and adjusted to a pH of 7.5 for filtration before purification. Next, HER2  
539 domain IV was purified using a HisTrap excel column (GE Healthcare). The filtrated media  
540 were loaded into the HisTrap excel column, followed by washing with 20 mM Tris-HCl (pH  
541 7.5), 100 mM NaCl and 20 mM Imidazole. Bound HER2 domain IV was eluted with an elution  
542 buffer (20 mM Tris-HCl, pH 7.5) containing 100 mM NaCl and 250 mM Imidazole. Thereafter,  
543 the TEV recognition site was cleaved using TEV protease. After desalting to 20 mM Tris-HCl  
544 (pH 7.5) containing 50 mM NaCl, HER2 domain IV was loaded into an anion-exchange  
545 chromatography column (HiTrap-Q, GE healthcare), and HER2 domain IV was collected from  
546 flow through.

547

548 **Crystallization, data collection, and structure determination of Rb-H2 in complex with**

549 **HER2 domain IV**

550 Rb-H2 and HER2 domain IV were mixed at a 1:1.5 molar ratio and incubated for 1 h at 4°C.  
551 The mixture was applied to the size-exclusion column (HiLoad 16/600 Superdex 200 pg, GE  
552 Healthcare). The complex protein between Rb-H2 and HER2 domain IV was concentrated at  
553 up to 10 mg/ml and used for crystallization. Initial crystallization screening was conducted by  
554 using Mosquito robot (TTP Labtech, Melbourn, UK), and single, appropriate size of crystals  
555 appeared at 0.1 M Sodium Citrate: Citric Acid (pH 5.5) and 20% PEG 3000. The complex  
556 crystals were quickly soaked into a crystal buffer containing 20 % ethylene glycol to protect  
557 the crystals from the low temperature of the liquid nitrogen. X-ray diffraction of the complex  
558 crystal was then conducted to collect diffraction images using a BL-1A micro-beam line at the  
559 Photon Factory (Japan). An integration of the images was conducted using the XDSGUI, and  
560 a scaling of the mtz file was also performed using the CCP4 program (Winn et al. 2011). The  
561 complex crystal belongs to the space group P212121 with  $a = 44.66 \text{ \AA}$ ,  $b = 80.07 \text{ \AA}$ , and  $c =$   
562  $108.41 \text{ \AA}$  in a cell unit. The initial phase was obtained through a molecular replacement (MR)  
563 by Molrep using HER2 (PDB ID: 1N8Z) and reepody (PDB ID: 5B4P) as the initial searching  
564 model (Vagin and Isupov 2001). Model building was conducted using the Coot program, and  
565 refinement was achieved using Refmac5 (Emsley et al. 2010; Murshudov, Vagin, and Dodson  
566 1997). A three-dimensional representation of the structure was carried out using the PyMOL  
567 program.

568

569 **Cell culture**

570 Sk-Br3, Sk-Ov3, MCF-7, MDA-MB-468 (ATCC, Manassas, VA, USA) cell lines were  
571 cultured in RPMI 1640 media supplemented with 10% FBS, 100 U/mL penicillin, 100 µg/mL  
572 streptomycin (Capricorn Scientific, Ebsdorfergrund, Germany) at 37 °C incubator with 5%  
573 CO<sub>2</sub>.

574

### 575 **Immunofluorescence labeling and confocal microscopy**

576 NHS-Fluorescein (Thermo Scientific) was prepared in DMSO (Sigma Aldrich) at a  
577 concentration of 10 mg/mL and mixed with a rebody dissolved in PBS (pH 7.4) at a dye-to-  
578 protein ratio of 10 with a final concentration of a rebody aimed to 2 mg/mL. The mixture of  
579 protein and dye was incubated at 4 °C overnight. Excess dye was removed using 0.22 µm  
580 centrifugal filter at 13000 rpm for 10 min and subjected to PD-10 desalting column (GE  
581 Healthcare). The concentration of a FITC-labeled rebody was measured by NanoDrop 2000c  
582 (Thermo Scientific). For confocal microscopy, cells were detached using non-enzymatic cell  
583 dissociation solution (Sigma Aldrich) when they reached 80 % confluence, and seeded into a  
584 8-well slide glass (SPL Life Sciences) at  $3.5 \times 10^3$  cells/well. After 48 h of incubation, cells were  
585 gently washed with DPBS (Welgene, Seoul, Korea) for 3 times and treated with a FITC-labeled  
586 rebody at 4 °C to prevent endocytosis for 2 h. Following the removal of proteins, cells were  
587 gently washed again with DPBS for 3 times and fixed with 4 % paraformaldehyde in PBS for  
588 30 min at room temperature. After washing with DPBS for three times, cells were stained with  
589 DAPI. Cell images were obtained using LSM 780 Confocal Microscopy (Carl Zeiss,  
590 Oberkochen, Germany).

591

### 592 ***In vitro* cytotoxicity**

593 Cells were detached using trypsin-EDTA (Gibco, Waltham, MA, USA) when they reached 80 %  
594 confluence and seeded into a 96-well plate (SPL Life Sciences) at  $1 \times 10^4$  cells/well. After 24 h  
595 of incubation, cells were treated with serially diluted (10-fold) rebody or trastuzumab in  
596 RPMI 1640 serum free media and further incubated for 72 h at 37 °C and 5 % CO<sub>2</sub> chamber.  
597 Cell cytotoxicity was measured by Cell Counting Kit-8 (Dojindo Molecular Technologies,

598 Kumamoto, Japan). Signals were detected at 450 nm using Infinite M200 microplate reader.  
599 Absorbance from cells treated with only media was converted to 100 % for comparison.

600

## 601 **Acknowledgements**

602 This research was supported by the Bio & Medical Technology Development Program (NRF-  
603 2017M3A9F5031419 to H.-S.K., NRF-2017M3A9F6029755, NRF-2019M3E5D6063903 to  
604 H.-S.C), Global Research Laboratory (NRF-2015K1A1A2033346 to H.-S.K.), Mid-Career  
605 Researcher Program (NRF-2017R1A2A1A05001091 to H.-S.K.), NRF-2018R1A5A2024181  
606 to Y.j.C., Science Research Center (NRF-2016R1A5A1010764 to H.-S.C) of the National  
607 Research Foundation (NRF) funded by the Ministry of Science and ICT of Korea. We thank  
608 the staff scientists for assistance at the beamline 1A and 17A of the Photon Factory and the  
609 beamline 11C of Pohang Light Source.

610

## 611 **Data availability**

612 Protein structure information are deposited in Protein Data Bank (Accession code: 6LBX).

613

## 614 **Competing interests**

615 The authors declare no financial competing interests.

616

## 617 **References**

- 618 Arkhipov, A., Y. Shan, E. T. Kim, R. O. Dror, and D. E. Shaw. 2013. 'Her2 activation  
619 mechanism reflects evolutionary preservation of asymmetric ectodomain dimers in the  
620 human EGFR family', *Elife*, 2: e00708.
- 621 Banappagari, S., S. Ronald, and S. D. Satyanarayanajois. 2010. 'A conformationally

- 622 constrained peptidomimetic binds to the extracellular region of HER2 protein', *J Biomol*  
623 *Struct Dyn*, 28: 289-308.
- 624 Baselga, J., and S. M. Swain. 2009. 'Novel anticancer targets: revisiting ERBB2 and  
625 discovering ERBB3', *Nat Rev Cancer*, 9: 463-75.
- 626 Brenke, R., D. R. Hall, G. Y. Chuang, S. R. Comeau, T. Bohnuud, D. Beglov, O. Schueler-  
627 Furman, S. Vajda, and D. Kozakov. 2012. 'Application of asymmetric statistical  
628 potentials to antibody-protein docking', *Bioinformatics*, 28: 2608-14.
- 629 Cannon, D. A., L. Shan, Q. Du, L. Shirinian, K. W. Rickert, K. L. Rosenthal, M. Korade, 3rd,  
630 L. E. van Vlerken-Ysla, A. Buchanan, T. J. Vaughan, M. M. Damschroder, and B.  
631 Popovic. 2019. 'Experimentally guided computational antibody affinity maturation with  
632 de novo docking, modelling and rational design', *PLoS Comput Biol*, 15: e1006980.
- 633 Chames, P., M. Van Regenmortel, E. Weiss, and D. Baty. 2009. 'Therapeutic antibodies:  
634 successes, limitations and hopes for the future', *Br J Pharmacol*, 157: 220-33.
- 635 Chevalier, A., D. A. Silva, G. J. Rocklin, D. R. Hicks, R. Vergara, P. Murapa, S. M. Bernard, L.  
636 Zhang, K. H. Lam, G. Yao, C. D. Bahl, S. I. Miyashita, I. Goresnik, J. T. Fuller, M. T.  
637 Koday, C. M. Jenkins, T. Colvin, L. Carter, A. Bohn, C. M. Bryan, D. A. Fernandez-  
638 Velasco, L. Stewart, M. Dong, X. Huang, R. Jin, I. A. Wilson, D. H. Fuller, and D. Baker.  
639 2017. 'Massively parallel de novo protein design for targeted therapeutics', *Nature*, 550:  
640 74-79.
- 641 Cho, H. S., K. Mason, K. X. Ramyar, A. M. Stanley, S. B. Gabelli, D. W. Denney, Jr., and D. J.  
642 Leahy. 2003. 'Structure of the extracellular region of HER2 alone and in complex with  
643 the Herceptin Fab', *Nature*, 421: 756-60.
- 644 Choi, Yoonjoo, Sukyo Jeong, Jung-Min Choi, Christian Ndong, Chris Bailey-Kellogg, Karl E.  
645 Griswold, and Hak-Sung Kim. 2019. 'Computer-aided Binding Mode Prediction and  
646 Affinity Maturation of LRR Protein Binder without Structural Determination', *bioRxiv*:

- 647 2019.12.18.880534.
- 648 Dunn, Ian S. 2010. *Searching for molecular solutions : empirical discovery and its future* (John  
649 Wiley & Sons: Hoboken, N.J.).
- 650 Emsley, P., B. Lohkamp, W. G. Scott, and K. Cowtan. 2010. 'Features and development of Coot',  
651 *Acta Crystallogr D Biol Crystallogr*, 66: 486-501.
- 652 Fleishman, S. J., A. Leaver-Fay, J. E. Corn, E. M. Strauch, S. D. Khare, N. Koga, J. Ashworth,  
653 P. Murphy, F. Richter, G. Lemmon, J. Meiler, and D. Baker. 2011. 'RosettaScripts: a  
654 scripting language interface to the Rosetta macromolecular modeling suite', *PLoS One*,  
655 6: e20161.
- 656 Fleishman, S. J., T. A. Whitehead, D. C. Ekiert, C. Dreyfus, J. E. Corn, E. M. Strauch, I. A.  
657 Wilson, and D. Baker. 2011. 'Computational design of proteins targeting the conserved  
658 stem region of influenza hemagglutinin', *Science*, 332: 816-21.
- 659 'Herceptin (Trastuzumab) [package insert]. U.S. Food and Drug Administration'. 1998.
- 660 Hornak, V., R. Abel, A. Okur, B. Strockbine, A. Roitberg, and C. Simmerling. 2006.  
661 'Comparison of multiple Amber force fields and development of improved protein  
662 backbone parameters', *Proteins*, 65: 712-25.
- 663 Houk, K. N., and F. Liu. 2017. 'Holy Grails for Computational Organic Chemistry and  
664 Biochemistry', *Acc Chem Res*, 50: 539-43.
- 665 Hwang, D. E., J. H. Ryou, J. R. Oh, J. W. Han, T. K. Park, and H. S. Kim. 2016. 'Anti-Human  
666 VEGF Repebody Effectively Suppresses Choroidal Neovascularization and Vascular  
667 Leakage', *PLoS One*, 11: e0152522.
- 668 Kastner, J., H. H. Loeffler, S. K. Roberts, M. L. Martin-Fernandez, and M. D. Winn. 2009.  
669 'Ectodomain orientation, conformational plasticity and oligomerization of ErbB1  
670 receptors investigated by molecular dynamics', *J Struct Biol*, 167: 117-28.
- 671 Kim, T. Y., J. H. Park, H. E. Shim, D. S. Choi, D. E. Lee, J. J. Song, and H. S. Kim. 2019.



- 672 'Prolonged half-life of small-sized therapeutic protein using serum albumin-specific  
673 protein binder', *J Control Release*, 315: 31-39.
- 674 Kozakov, D., D. R. Hall, B. Xia, K. A. Porter, D. Padhorny, C. Yueh, D. Beglov, and S. Vajda.  
675 2017. 'The ClusPro web server for protein-protein docking', *Nat Protoc*, 12: 255-78.
- 676 Ledford, H. 2008. 'Monoclonal antibodies come of age', *Nature*, 455: 437.
- 677 Lee, J. J., H. J. Choi, M. Yun, Y. Kang, J. E. Jung, Y. Ryu, T. Y. Kim, Y. J. Cha, H. S. Cho, J. J.  
678 Min, C. W. Chung, and H. S. Kim. 2015. 'Enzymatic prenylation and oxime ligation for  
679 the synthesis of stable and homogeneous protein-drug conjugates for targeted therapy',  
680 *Angew Chem Int Ed Engl*, 54: 12020-4.
- 681 Lee, J. J., H. J. Kim, C. S. Yang, H. H. Kyeong, J. M. Choi, D. E. Hwang, J. M. Yuk, K. Park,  
682 Y. J. Kim, S. G. Lee, D. Kim, E. K. Jo, H. K. Cheong, and H. S. Kim. 2014. 'A high-  
683 affinity protein binder that blocks the IL-6/STAT3 signaling pathway effectively  
684 suppresses non-small cell lung cancer', *Mol Ther*, 22: 1254-65.
- 685 Lee, S. C., K. Park, J. Han, J. J. Lee, H. J. Kim, S. Hong, W. Heu, Y. J. Kim, J. S. Ha, S. G.  
686 Lee, H. K. Cheong, Y. H. Jeon, D. Kim, and H. S. Kim. 2012. 'Design of a binding  
687 scaffold based on variable lymphocyte receptors of jawless vertebrates by module  
688 engineering', *Proc Natl Acad Sci U S A*, 109: 3299-304.
- 689 Lerner, R. A. 2006. 'Manufacturing immunity to disease in a test tube: the magic bullet realized',  
690 *Angew Chem Int Ed Engl*, 45: 8106-25.
- 691 Menard, S., S. M. Pupa, M. Campiglio, and E. Tagliabue. 2003. 'Biologic and therapeutic role  
692 of HER2 in cancer', *Oncogene*, 22: 6570-8.
- 693 Murshudov, G. N., A. A. Vagin, and E. J. Dodson. 1997. 'Refinement of macromolecular  
694 structures by the maximum-likelihood method', *Acta Crystallogr D Biol Crystallogr*,  
695 53: 240-55.
- 696 O'Meara, M. J., A. Leaver-Fay, M. D. Tyka, A. Stein, K. Houlihan, F. DiMaio, P. Bradley, T.

- 697 Kortemme, D. Baker, J. Snoeyink, and B. Kuhlman. 2015. 'Combined covalent-  
698 electrostatic model of hydrogen bonding improves structure prediction with Rosetta', *J*  
699 *Chem Theory Comput*, 11: 609-22.
- 700 Rackers, J. A., Z. Wang, C. Lu, M. L. Laury, L. Lagardere, M. J. Schnieders, J. P. Piquemal, P.  
701 Y. Ren, and J. W. Ponder. 2018. 'Tinker 8: Software Tools for Molecular Design',  
702 *Journal of Chemical Theory and Computation*, 14: 5273-89.
- 703 Ramisch, S., U. Weininger, J. Martinsson, M. Akke, and I. Andre. 2014. 'Computational design  
704 of a leucine-rich repeat protein with a predefined geometry', *Proc Natl Acad Sci U S A*,  
705 111: 17875-80.
- 706 Silva, D. A., S. Yu, U. Y. Ulge, J. B. Spangler, K. M. Jude, C. Labao-Almeida, L. R. Ali, A.  
707 Quijano-Rubio, M. Ruterbusch, I. Leung, T. Biary, S. J. Crowley, E. Marcos, C. D.  
708 Walkey, B. D. Weitzner, F. Pardo-Avila, J. Castellanos, L. Carter, L. Stewart, S. R.  
709 Riddell, M. Pepper, G. J. L. Bernardes, M. Dougan, K. C. Garcia, and D. Baker. 2019.  
710 'De novo design of potent and selective mimics of IL-2 and IL-15', *Nature*, 565: 186-  
711 91.
- 712 Still, W. C., A. Tempezyk, R. C. Hawley, and T. Hendrickson. 1990. 'Semianalytical Treatment  
713 of Solvation for Molecular Mechanics and Dynamics', *Journal of the American*  
714 *Chemical Society*, 112: 6127-29.
- 715 Tebbutt, N., M. W. Pedersen, and T. G. Johns. 2013. 'Targeting the ERBB family in cancer:  
716 couples therapy', *Nat Rev Cancer*, 13: 663-73.
- 717 Tinberg, C. E., S. D. Khare, J. Dou, L. Doyle, J. W. Nelson, A. Schena, W. Jankowski, C. G.  
718 Kalodimos, K. Johnsson, B. L. Stoddard, and D. Baker. 2013. 'Computational design of  
719 ligand-binding proteins with high affinity and selectivity', *Nature*, 501: 212-16.
- 720 Vagin, A. A., and M. N. Isupov. 2001. 'Spherically averaged phased translation function and its  
721 application to the search for molecules and fragments in electron-density maps', *Acta*

- 722            *Crystallogr D Biol Crystallogr*, 57: 1451-6.
- 723    Weitzner, B. D., J. R. Jeliazkov, S. Lyskov, N. Marze, D. Kuroda, R. Frick, J. Adolf-Bryfogle,  
724            N. Biswas, R. L. Dunbrack, Jr., and J. J. Gray. 2017. 'Modeling and docking of antibody  
725            structures with Rosetta', *Nat Protoc*, 12: 401-16.
- 726    Whitehead, T. A., D. Baker, and S. J. Fleishman. 2013. 'Computational design of novel protein  
727            binders and experimental affinity maturation', *Methods Enzymol*, 523: 1-19.
- 728    Winn, M. D., C. C. Ballard, K. D. Cowtan, E. J. Dodson, P. Emsley, P. R. Evans, R. M. Keegan,  
729            E. B. Krissinel, A. G. Leslie, A. McCoy, S. J. McNicholas, G. N. Murshudov, N. S.  
730            Pannu, E. A. Potterton, H. R. Powell, R. J. Read, A. Vagin, and K. S. Wilson. 2011.  
731            'Overview of the CCP4 suite and current developments', *Acta Crystallogr D Biol*  
732            *Crystallogr*, 67: 235-42.
